# Supplementary material
Source: MDPI journal article supplement (https://www.mdpi.com/2071-1050/15/12/9794)
Supplement: s1 [file s1]

## Supplementary Information

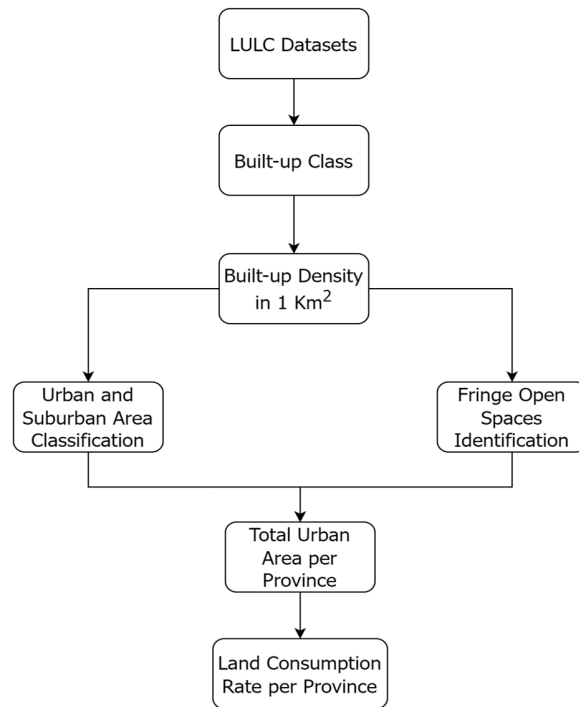

**Figure S1** Workflow of LCR calculation

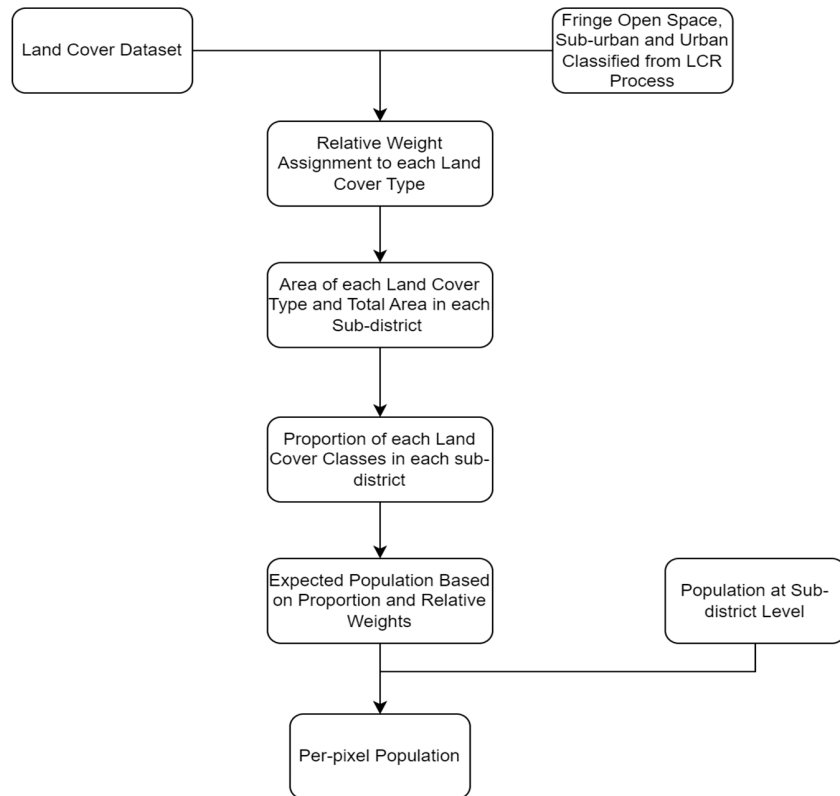

**Figure S2** Workflow of PGR calculation of the study

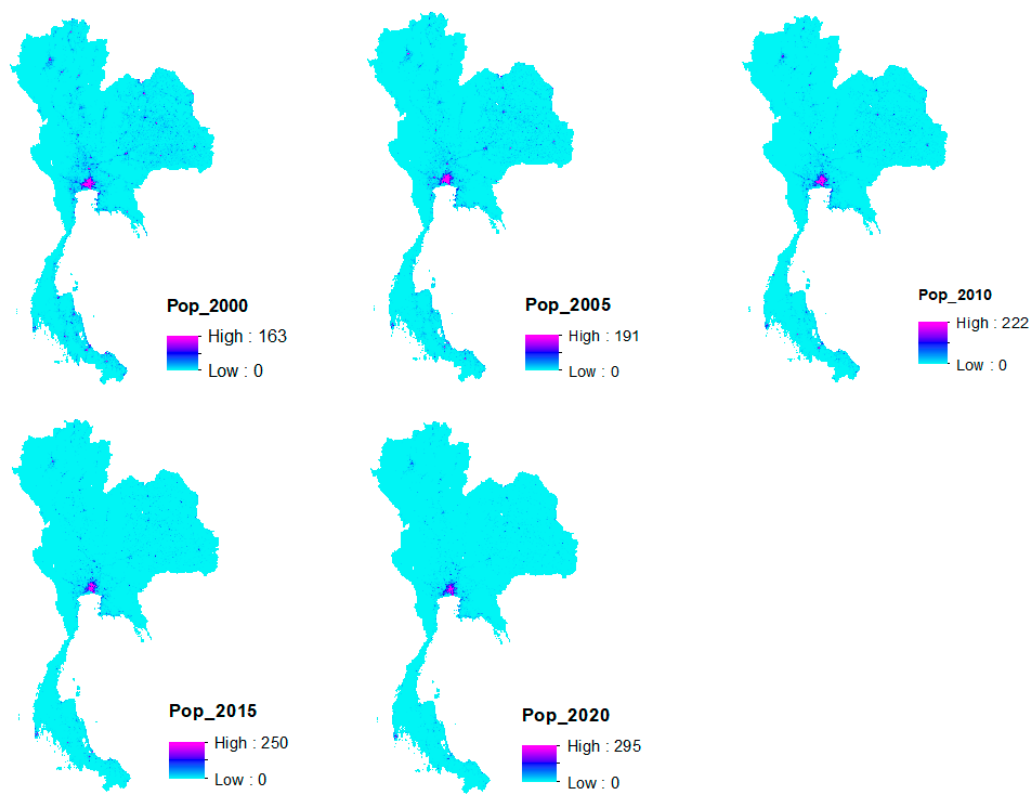

**Figure S3.** Population distribution of Thailand at pixel level using relative weights

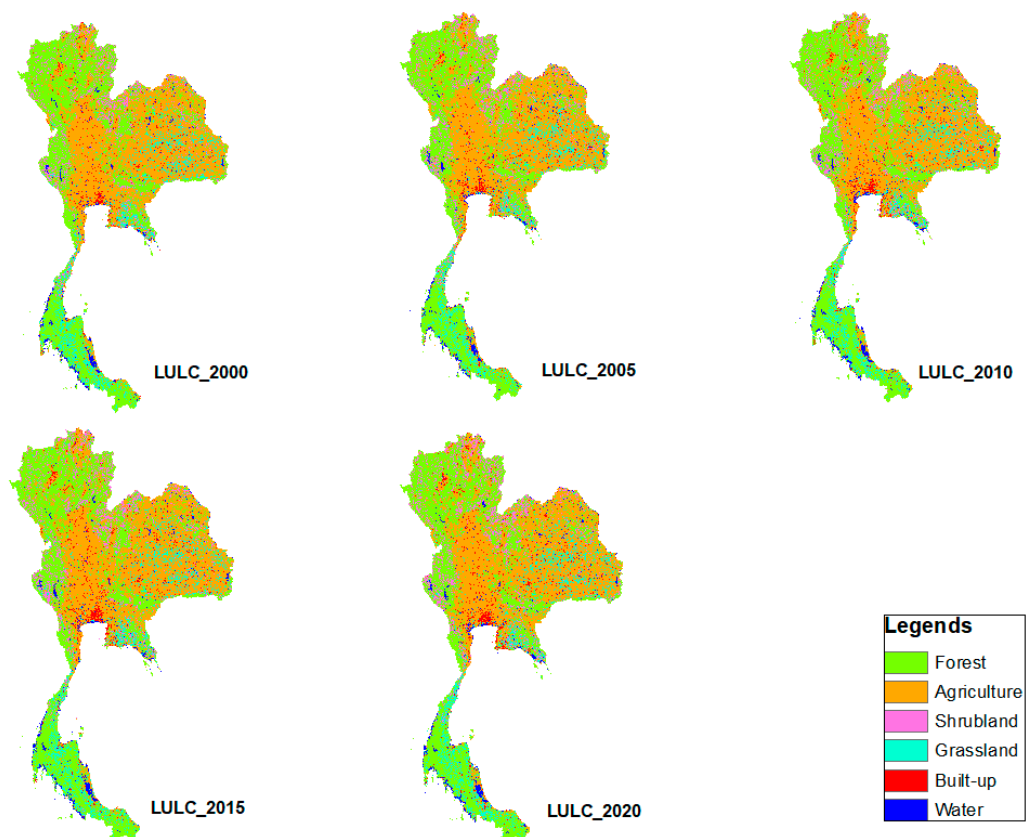

**Figure S4.** LULC maps of Thailand for the years 2000, 2005, 2010, 2015 and 2020.

**Table S1** Details on data sets used in the study

| Dataset                                      | Source                                                                                                                                                                                                      | Data Type | Spatial Resolution           |
|----------------------------------------------|-------------------------------------------------------------------------------------------------------------------------------------------------------------------------------------------------------------|-----------|------------------------------|
| Global Land Cover Fine Classification System | Aerospace Information Research Institute, Chinese Academy of Sciences<br><a href="https://data.casearth.cn/thematic/glc_fcs30">https://data.casearth.cn/thematic/glc_fcs30</a> (accessed on 22 April 2023). | Raster    | 30 meters                    |
| Thailand administrative Boundary             | Survey Department of Thailand                                                                                                                                                                               | Vector    | Whole kingdom                |
| Population                                   | <a href="http://statbbi.nso.go.th/staticreport/page/sector/en/01.aspx">http://statbbi.nso.go.th/staticreport/page/sector/en/01.aspx</a> (accessed on 22 April 2023)                                         | .Xlx      | Provincial and sub-districts |

**Table S2.** Assignments of relative weights in different land classes

| S.N. | Land Cover Class                        | Relative Weight ( <i>R<sub>w</sub></i> ) |
|------|-----------------------------------------|------------------------------------------|
| 1    | Rural Area                              | 5                                        |
| 2    | Fringe open space                       | 10                                       |
| 3    | Sub-urban                               | 15                                       |
| 4    | Urban                                   | 60                                       |
| 5    | Agricultural land                       | 5                                        |
| 6    | Natural (Forest, bare, herbaceous etc.) | 5                                        |
| 7    | Water bodies                            | 0                                        |

**Table S3** Significance test for the correlation between LCR and PGR

| <b>Studied Years (LCR vs PGR)</b> | <b>Pearson's <math>r</math></b> |
|-----------------------------------|---------------------------------|
| 2000 ~ 2005                       | 0.38                            |
| 2005 ~ 2010                       | 0.56                            |
| 2010 ~ 2015                       | 0.33                            |
| 2015 ~ 2020                       | 0.15                            |
